# Supplementary material for: Zika Virus with Increased CpG Dinucleotide Frequencies Shows Oncolytic Activity in Glioblastoma Stem Cells
Source: Viruses. 2020 May 25;12(5):579. doi: 10.3390/v12050579 (PMC7290362; doi:10.3390/v12050579)
Supplement: Supplementary file 1 [file viruses-12-00579-s001.pdf]

# Supplementary Materials: Zika Virus with Increased CpG Dinucleotide Frequencies Shows Oncolytic Activity in Glioblastoma Stem Cells

Ivan Trus, Nathalie Berube, Peng Jiang, Janusz Rak, Volker Gerdts and Uladzimir Karniychuk

Table S1. CpG dinucleotide composition in ZIKV variants.

| Genomic region   | ZIKV variant | Number of CpGs |
|------------------|--------------|----------------|
| E                | Wild-type    | 35             |
|                  | Permuted     | 35             |
|                  | E+32CpG      | 67             |
|                  | E+102CpG     | 137            |
|                  | E/NS1+176CpG | 137            |
| NS1              | Wild-type    | 25             |
|                  | Permuted     | 25             |
|                  | E+32CpG      | 25             |
|                  | E+102CpG     | 25             |
|                  | E/NS1+176CpG | 99             |
| ORF <sup>1</sup> | Wild-type    | 316            |
|                  | Permuted     | 316            |
|                  | E+32CpG      | 348            |
|                  | E+102CpG     | 418            |
|                  | E/NS1+176CpG | 492            |

<sup>1</sup> ORF: open reading frame

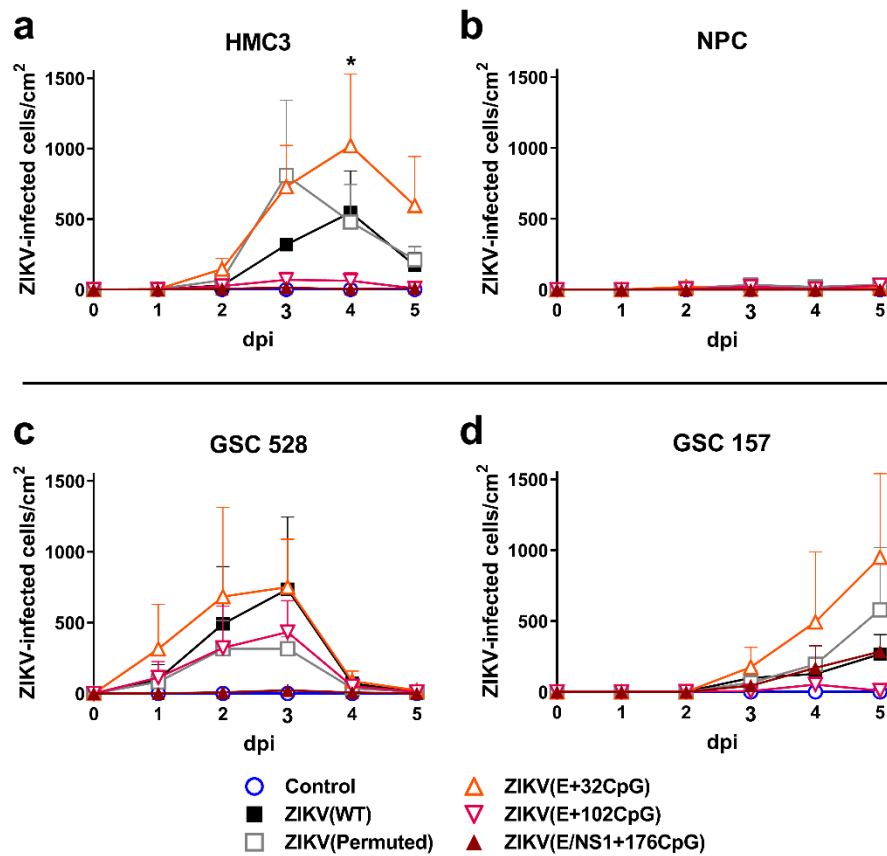

**Figure S1.** Infection kinetics in nonmalignant human brain cells (HMC3 (a) and NPC (b)) and tumor glioblastoma stem cells (528 (c) and 157 (d)) after inoculation at an MOI of 0.01. The 96-well plates with cell monolayers were stained with ZIKV-specific Abs and infected cells were counted in the whole well with bright-field microscopy at 200×. Whiskers represent standard error of the mean (SE) from three biologically independent replicates with three technical replicates. “dpi”—days post-inoculation. The asterisk (\*) indicates  $p < 0.05$  vs. WT: (a) E+102CpG and E/NS1+176CpG at 4 dpi.
